# Supplementary material
Source: PubMed Central journal article supplement (PMC4565173)
Supplement: supp_3.2.E182_2014-0099-1-at.pdf [file supp_3.2.E182_2014-0099-1-at.pdf]

**Appendix 1: Remuneration options and adjusted odds ratios for obtaining follow-up care after discharge from the emergency department**

Diagram of organization and remuneration options for primary care in Ontario

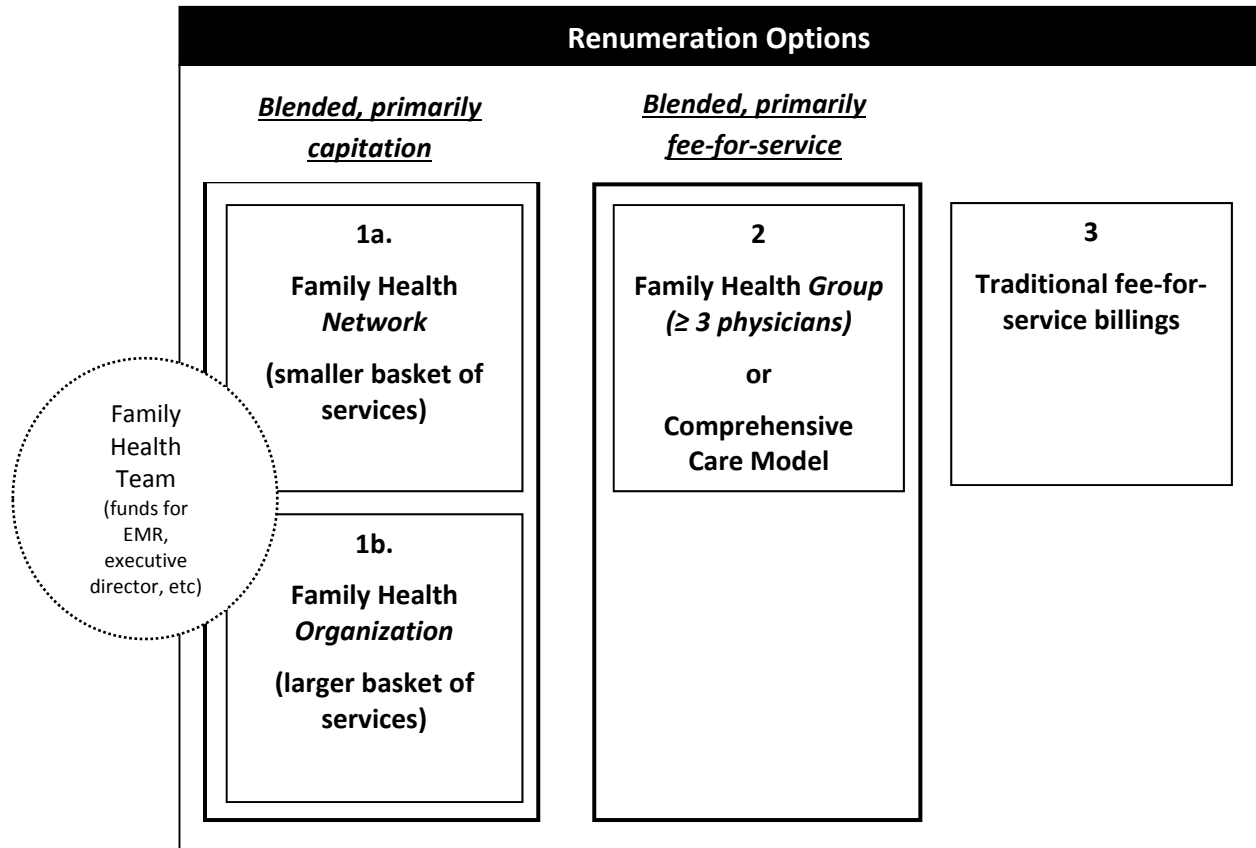

EMR: electronic medical records

Adjusted odds of obtaining follow-up care by a family physician, cardiologist, or internist, within seven days of emergency department discharge, among patients who had a family physician

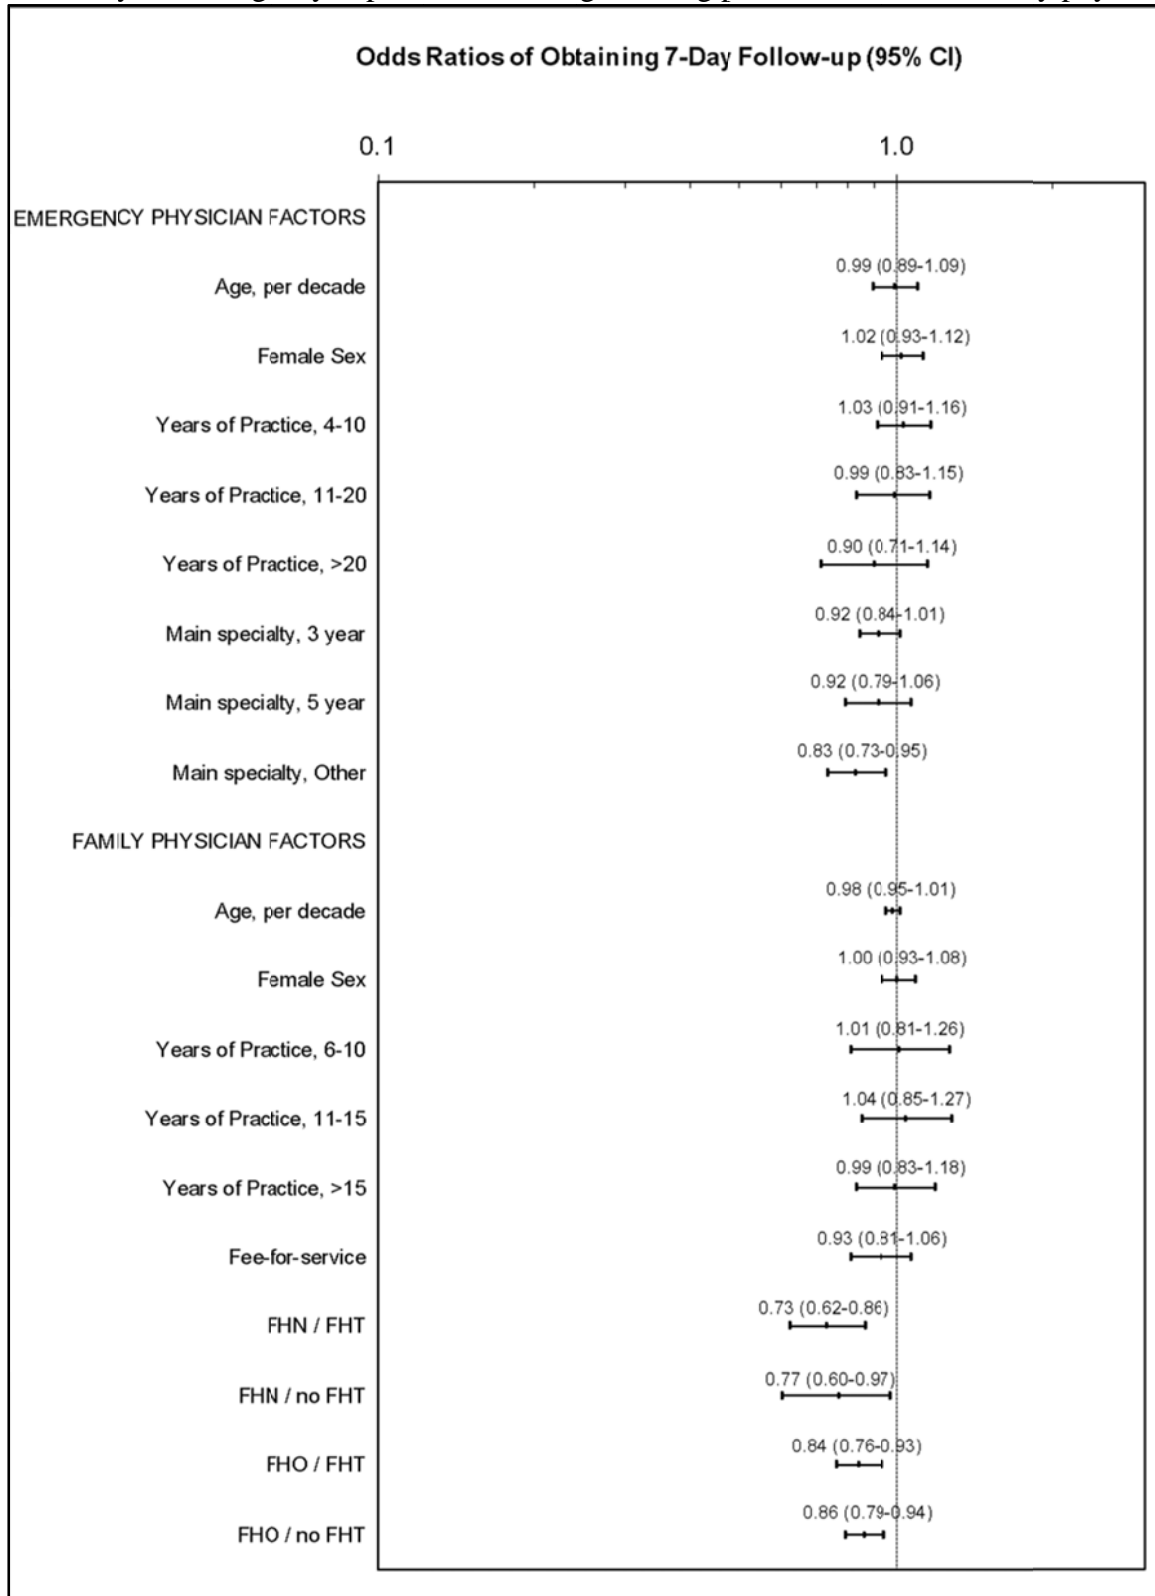

Adjusted odds of obtaining follow-up care by a family physician, cardiologist, or internist, within three days of emergency department discharge, among patients who had a family physician

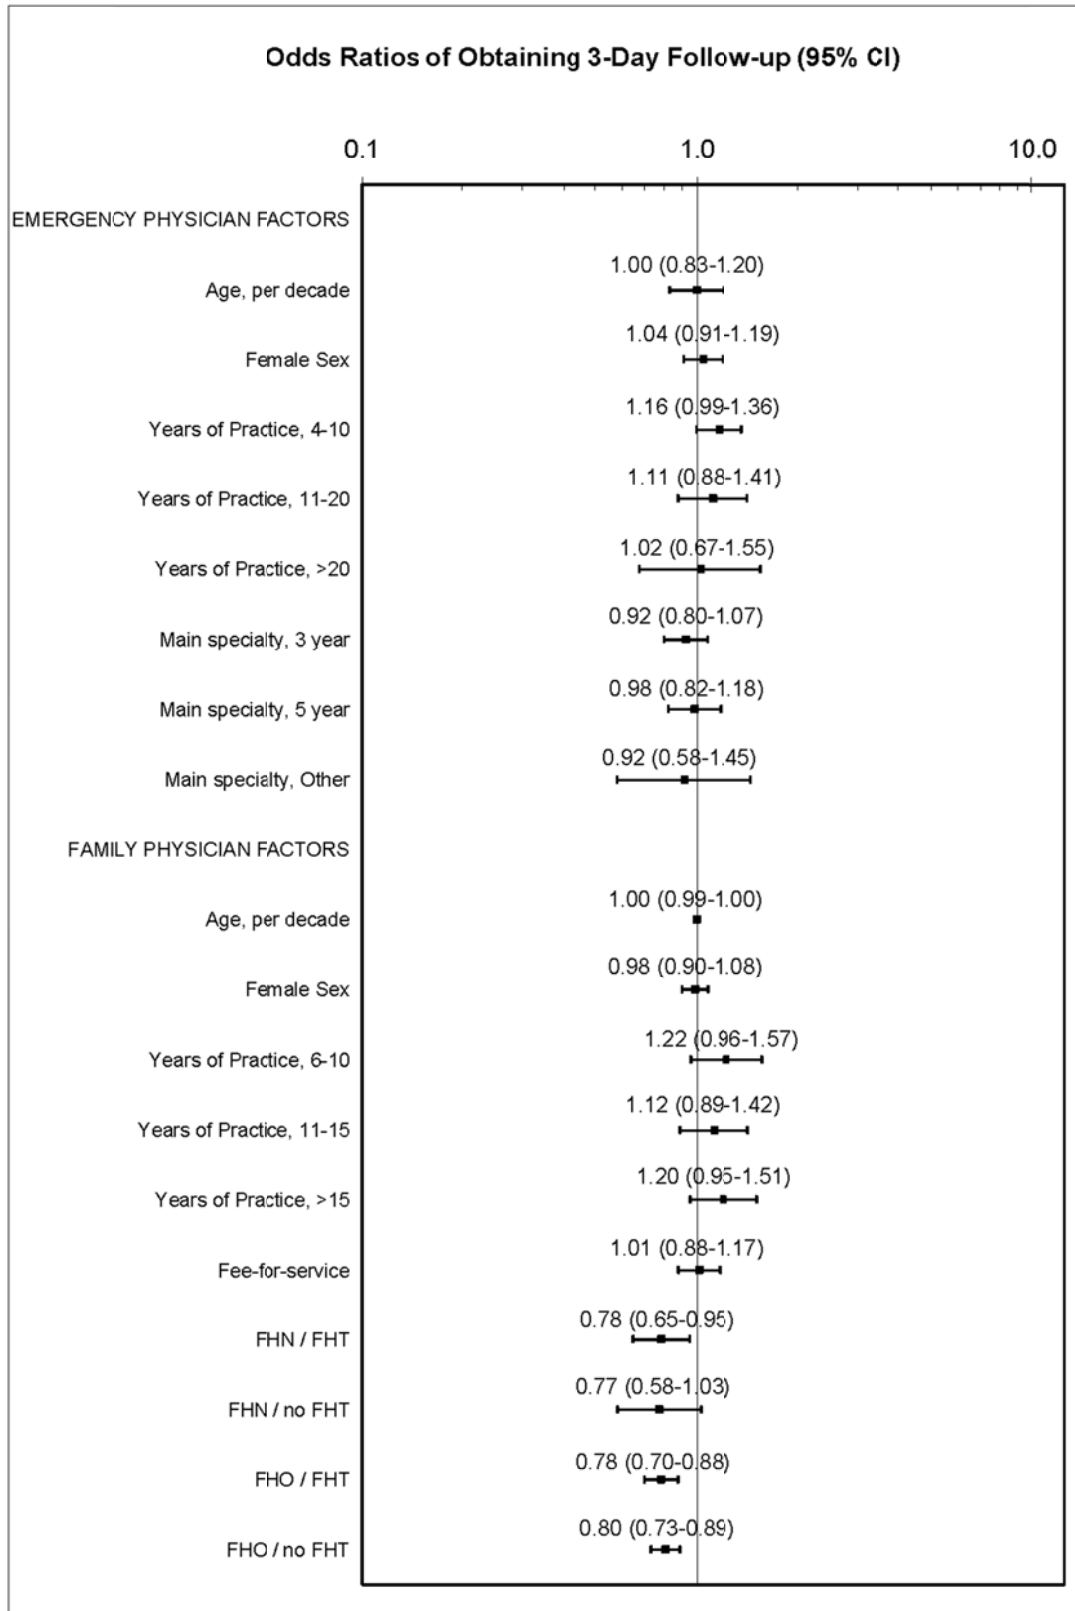

Adjusted odds of obtaining follow-up care by a family physician, cardiologist, or internist, within 30 days of emergency department discharge, among patients who had a family physician

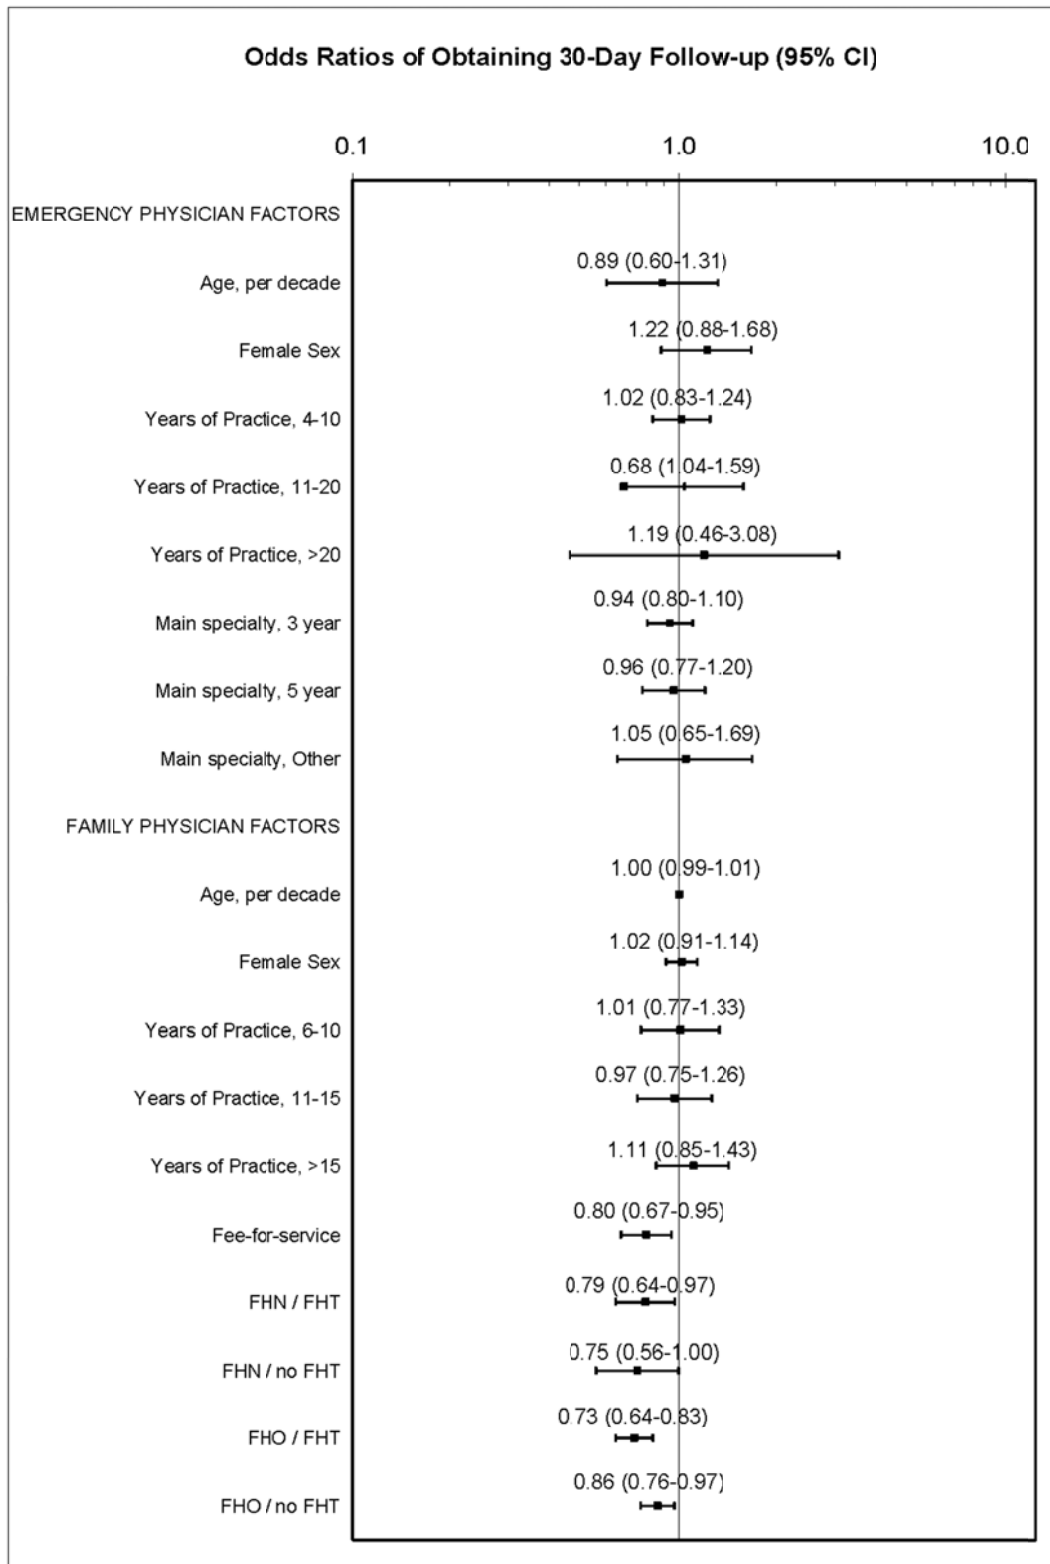

CCM (Comprehensive Care Model) or FHG (Family Health Group): mostly fee-for-service models (less than 3 physicians or 3+ physicians, respectively)

Appendix to: Atzema C, Yu B, Ivers N, Rochon P, Lee DS, Schull MJ, Austin PC. Incident atrial fibrillation in the emergency department in Ontario: a population-based retrospective cohort study of follow-up care. *CMAJ Open* 2015. DOI:10.9788/cmajo.20140099. Copyright © 2015 8872147 Canada Inc. or its licensors

FHN (Family Health Network) and FHO (Family Health Organization): mostly capitation based reimbursement  
FHT (Family Health Team): not a reimbursement model, includes an interdisciplinary team
